# Supplementary material
Source: publisher figshare collection journal article supplement (https://acs.figshare.com/ndownloader/files/16107581)
Supplement: Supplementary file 1 [file 16107581]

Supplementary Information  
for  
Understanding the Thermodynamics of the  
Binding of PAMAM Dendrimers to Graphene:  
a Combined Analytical and Simulation Study

Mounika Gosika,<sup>†</sup> Swati Sen,<sup>‡</sup> Arindam Kundagrami,<sup>‡</sup> and Prabal K Maiti<sup>\*,†</sup>

<sup>†</sup>*Center for Condensed Matter Theory, Department of Physics, Indian Institute of Science,  
Bangalore-560012, India.*

<sup>‡</sup>*Department of Physical Sciences, IISER Kolkata, Mohanpur-741246, India.*

E-mail: maiti@iisc.ac.in

Phone: (091)80-2293-2865

## 1. Chemical Structure of the Dendrimer

Shown in figure S1 are the details of the various amines of a G1 PAMAM dendrimer. At neutral pH ( $\sim 7$ ) the primary amines (circled in green) will be protonated. At low pH ( $\sim 4$ ) the tertiary amines at the core and the branch points (circled in blue) will also be protonated.

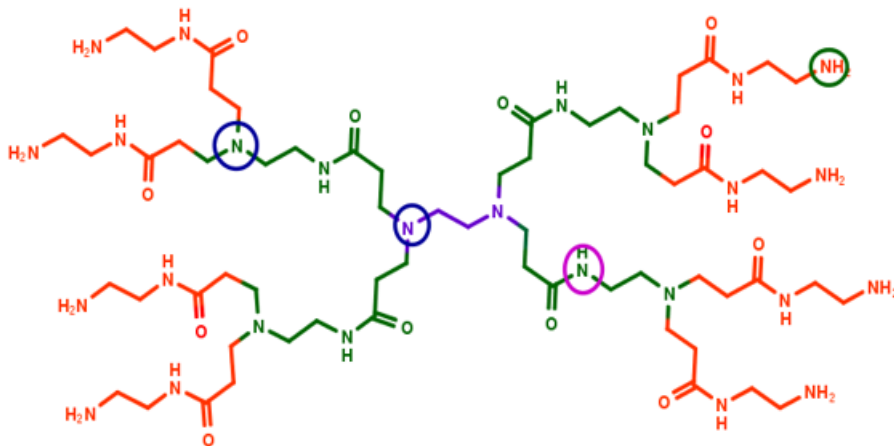

Figure S1: Schematic of G1 PAMAM dendrimer. The primary, secondary and tertiary amines are circled in green, pink and blue respectively.

## 2. Equilibrium Simulation Details

Table S1: Details of the Equilibrium simulations and some of the structural parameters of the dendrimer. *Bulk* stands for the bulk simulation and *Ads* stands for the simulations with graphene sheet.

| Case | Simulation time (ns) |     | $\langle R_g \rangle$ ( $\text{\AA}$ ) |      | $\langle R_g \rangle_{\parallel}$ ( $\text{\AA}$ )<br>(Ads) | $\langle R_g \rangle_{\perp}$ ( $\text{\AA}$ )<br>(Ads) | Height ( $\text{\AA}$ )<br>(Ads) |
|------|----------------------|-----|----------------------------------------|------|-------------------------------------------------------------|---------------------------------------------------------|----------------------------------|
|      | Bulk                 | Ads | Bulk                                   | Ads  |                                                             |                                                         |                                  |
| G3NP | 70                   | 55  | 12.5                                   | 13.8 | 12.1                                                        | 6.5                                                     | 29.3                             |
| G3P  | 90                   | 100 | 15.3                                   | 17.3 | 15.9                                                        | 7.0                                                     | 31.8                             |
| G3AC | 70                   | 80  | 19.6                                   | 19.4 | 17.7                                                        | 8.1                                                     | 33.2                             |
| G4NP | 70                   | 120 | 16.1                                   | 17.4 | 15.9                                                        | 7.1                                                     | 29.9                             |
| G4P  | 90                   | 85  | 20.5                                   | 22.1 | 19.0                                                        | 11.4                                                    | 45.4                             |
| G4AC | 70                   | 80  | 24.4                                   | 24.5 | 20.7                                                        | 13.1                                                    | 52.3                             |

### 3. Comparing the PMF profiles from WHAM and force integration methods

The total PMF profiles from force integration are obtained by summing the contributions from dendrimer-graphene, dendrimer-water and dendrimer-ion interactions presented in figure 7 of main-text.

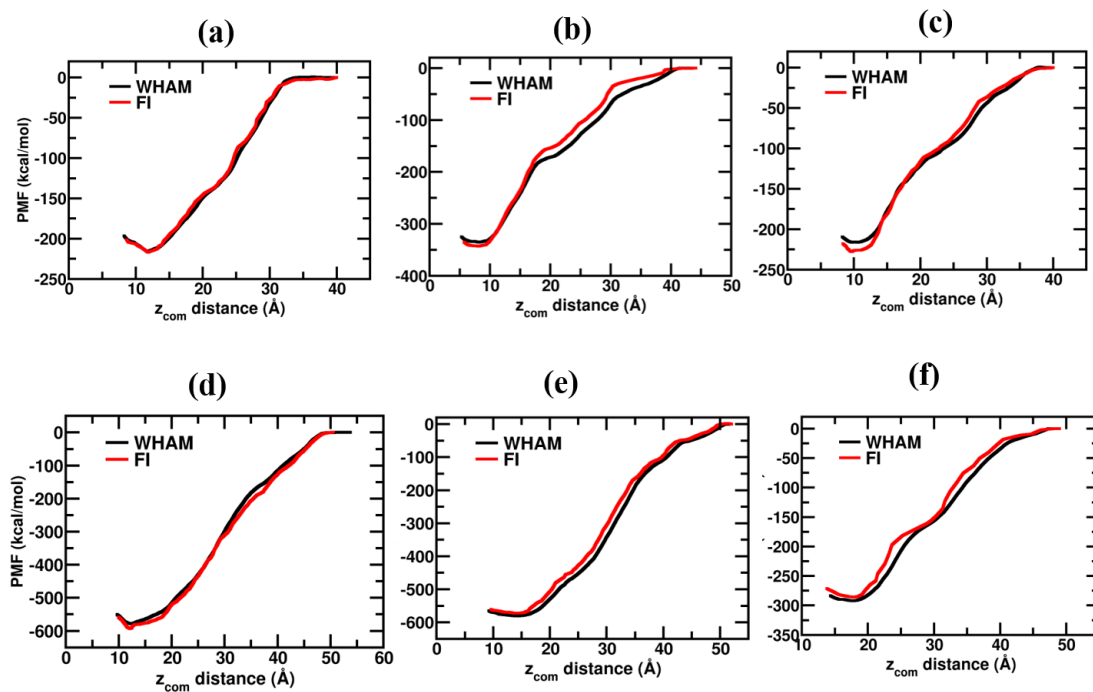

Figure S2: Comparing the PMF profiles from WHAM and force integration (FI) for (a) G3NP (b) G3P (c) G3AC (d) G4NP (e) G4P and (f) G4AC.
